# Supplementary material for: A High-Resolution Framework for Urban Pluvial Flood Risk Mapping
Source: Copernicus journal article supplement (doi:10.5194/egusphere-2025-6362), 2026-01-12
Supplement: Supplementary file 1 [file egusphere-2025-6362-supplement-version4.pdf]

## Supplemental material for

# A High-Resolution Framework for Urban Pluvial Flood Risk Mapping

5 Anastasia Vogelbacher<sup>1,2\*</sup>, Malte von Szombathely<sup>3\*</sup>, Marc Lennartz<sup>4</sup>, Benjamin Poschlod<sup>3,5</sup> and Jana Sillmann<sup>3</sup>

1 Institute of Geo-Hydroinformatics, Hamburg University of Technology, 21073 Hamburg, Germany

2 United Nations University Institute for Water, Environment and Health (UNU-INWEH), United Nations University Hub on

10 Engineering to Face Climate Change at the Hamburg University of Technology, 21073 Hamburg, Germany

3 Earth and Society Research Hub (ESRAH), Universität Hamburg, 20144 Hamburg, Germany

4 Section Hydrology, GFZ Helmholtz Centre for Geosciences, 14412 Potsdam, Germany

5 Institute for Global Water Security, Hamburg University of Technology, 21079 Hamburg, Germany

15 *Correspondence to:* Malte von Szombathely (malte.szombathely@uni-hamburg.de), Anastasia Vogelbacher (anastasia.vogelbacher@tuhh.de)

## 20 **Contents of this file**

Table S1

Figures S1 to S14

## 25 **Introduction**

Supplementary information includes information on input data and tool user interfaces. Additionally, we provide figures of the output attribute tables of the applied ArcGIS tools.

**Table S1:** Overview of local authorities and institutions involved in the development of the pluvial risk map.

30

| <b>Institution and local authorities involved in the stakeholder workshops</b>                                                                                                     | <b>Impact explanation</b>                                                                                                                                   |
|------------------------------------------------------------------------------------------------------------------------------------------------------------------------------------|-------------------------------------------------------------------------------------------------------------------------------------------------------------|
| Scientists working on local adaptation planning and climate risks, geography and urban research                                                                                    | Development of the toolbox, index development and method development.                                                                                       |
| BUKEA                                                                                                                                                                              | Potential beneficiary of the toolbox, consulting regarding input data and methodology, applicability, result plausibility and transferability.              |
| The State Agency for Geoinformation and Surveying provides geoinformation systems and geoportals.                                                                                  | Application of the toolbox in the local data infrastructure. Consulting regarding technical applicability.                                                  |
| Local drinking water supply and wastewater treatment company                                                                                                                       | Consulting in local adaptation and urban planning for rainwater infrastructure adaptation and hazard (rainwater) modelling and plausibility of the results. |
| State Agency for Roads, Bridges, and Waterways responsible for the planning, construction, maintenance, and operation of a large part of the city's transportation infrastructure. | Consulting regarding the input data and usage of the toolbox and plausibility of the results.                                                               |

|    | OBJECTID * ▲ | Shape * | ID | WR | C | ES | EDQ | Floors | Building type | StatisticalUnit |
|----|--------------|---------|----|----|---|----|-----|--------|---------------|-----------------|
| 1  | 1            | Polygon | 1  | 1  | 1 | 0  | 0   | 1      | 1             | 1               |
| 2  | 2            | Polygon | 2  | 1  | 1 | 0  | 0   | 1      | 1             | 1               |
| 3  | 3            | Polygon | 3  | 2  | 2 | 1  | 1   | 2      | 1             | 1               |
| 4  | 4            | Polygon | 4  | 0  | 1 | 1  | 0   | 2      | 2             | 1               |
| 5  | 5            | Polygon | 5  | 1  | 1 | 1  | 0   | 1      | 1             | 1               |
| 6  | 6            | Polygon | 6  | 1  | 1 | 1  | 0   | 1      | 1             | 1               |
| 7  | 7            | Polygon | 7  | 4  | 3 | 2  | 1   | 2      | 1             | 1               |
| 8  | 8            | Polygon | 8  | 1  | 0 | 0  | 0   | 1      | 1             | 1               |
| 9  | 9            | Polygon | 9  | 2  | 0 | 1  | 0   | 1      | 1             | 1               |
| 10 | 10           | Polygon | 10 | 0  | 0 | 1  | 0   | 2      | 1             | 1               |

**Figure S1: Excerpt of input data attribute-table.** The screenshot contains the first ten (of 37) rows of the example ArcGIS-layer used for the analysis. WR reflects the welfare recipients, C the Children younger 10 years old, ES the elderly singles above 65 years old, EDQ represents the educational level. A value of one represents one resident leaving school within the past three years without a high school diploma. Floors reflect the number of floors per building and Building type the usage of solely living use (1) or mixed use (2).

35

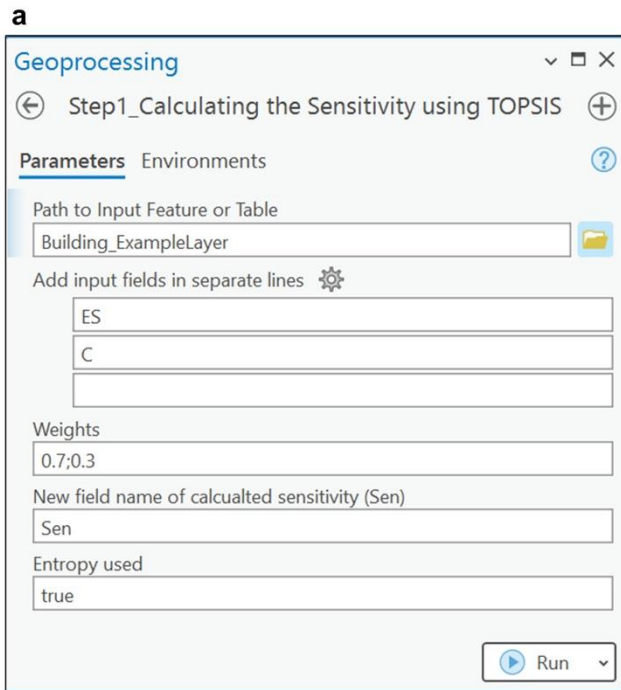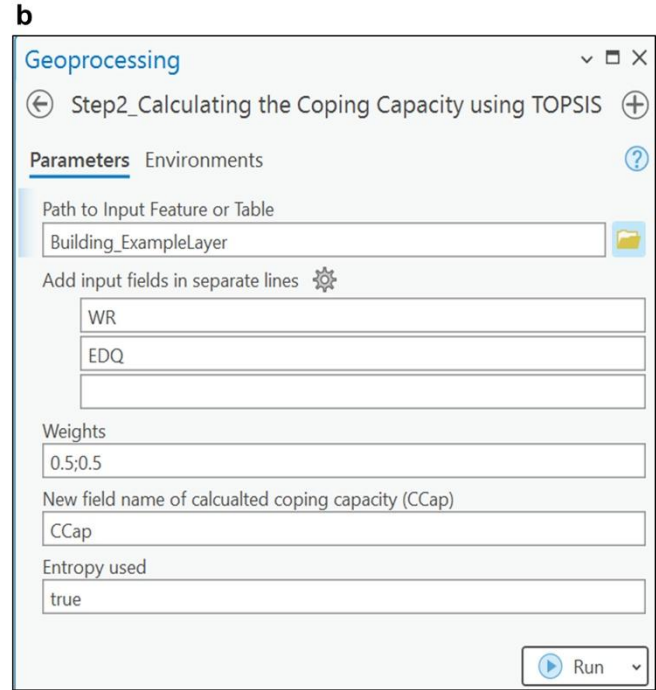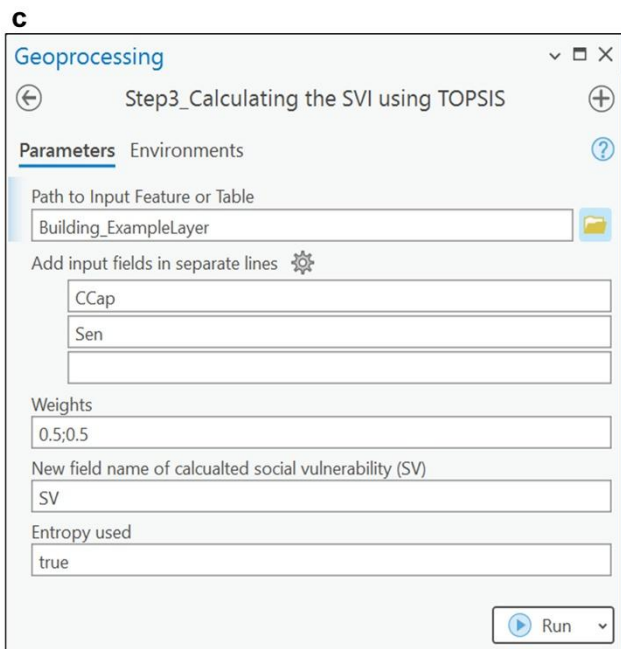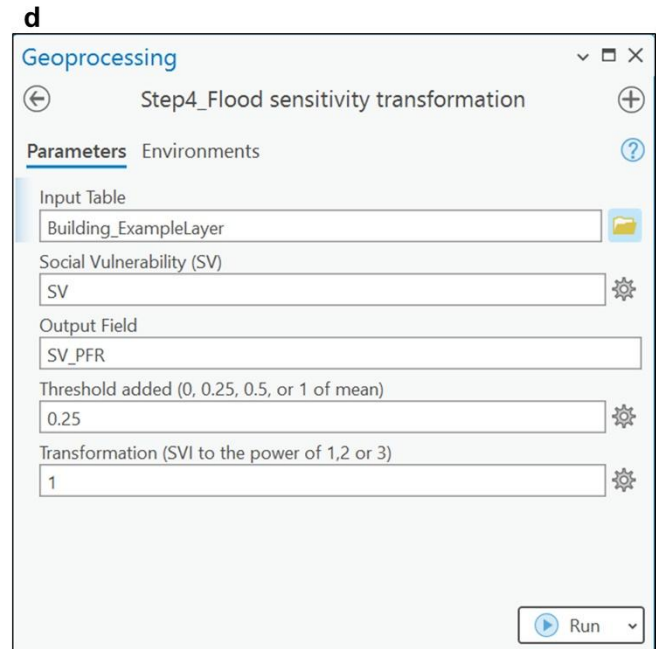

**Figure S2: Social Vulnerability Tools.** (a) shows the tool used for the calculation of sensitivity using the example layer as input. (b) shows the second tool used for the estimation of coping capacity, whereas (c) depict the calculator of the social vulnerability variable (SV) and its transformation to the final SV index to pluvial flood risk ( $SV_{PFR}$ )

|    | OBJECTID * ▲ | Shape * | ID | WR | C | ES | EDQ | Floors | Building type | StatisticalUnit | Residents | LivingArea | Area_house | Sen  | CCap | SV   | SV_PF |
|----|--------------|---------|----|----|---|----|-----|--------|---------------|-----------------|-----------|------------|------------|------|------|------|-------|
| 1  | 1            | Polygon | 1  | 1  | 1 | 0  | 0   | 1      | 1             | 1               | 250       | 9000       | 221,78     | 0,25 | 0,33 | 0,29 | 0,18  |
| 2  | 2            | Polygon | 2  | 1  | 1 | 0  | 0   | 1      | 1             | 1               | 250       | 9000       | 214,24     | 0,25 | 0,33 | 0,29 | 0,18  |
| 3  | 3            | Polygon | 3  | 2  | 2 | 1  | 1   | 2      | 1             | 1               | 250       | 9000       | 359,24     | 0,55 | 0,75 | 0,63 | 0,59  |
| 4  | 4            | Polygon | 4  | 0  | 1 | 1  | 0   | 2      | 2             | 1               | 250       | 9000       | 372,77     | 0,58 | 0    | 0,64 | 0,6   |
| 5  | 5            | Polygon | 5  | 1  | 1 | 1  | 0   | 1      | 1             | 1               | 250       | 9000       | 209,23     | 0,58 | 0,33 | 0,44 | 0,33  |
| 6  | 6            | Polygon | 6  | 1  | 1 | 1  | 0   | 1      | 1             | 1               | 250       | 9000       | 250,03     | 0,58 | 0,33 | 0,44 | 0,33  |
| 7  | 7            | Polygon | 7  | 4  | 3 | 2  | 1   | 2      | 1             | 1               | 250       | 9000       | 667,58     | 1,11 | 1    | 0,99 | 1,27  |
| 8  | 8            | Polygon | 8  | 1  | 0 | 0  | 0   | 1      | 1             | 1               | 250       | 9000       | 209,23     | 0    | 0,33 | 0,43 | 0,32  |
| 9  | 9            | Polygon | 9  | 2  | 0 | 1  | 0   | 1      | 1             | 1               | 250       | 9000       | 300,29     | 0,86 | 0,61 | 0,69 | 0,68  |
| 10 | 10           | Polygon | 10 | 0  | 0 | 1  | 0   | 2      | 1             | 1               | 250       | 9000       | 285,75     | 0,86 | 0    | 0,85 | 0,98  |

**Figure S3: Attribute table of the example data table after implementing the Social Vulnerability Toolset.** Sensitivity (Sen) and Coping Capacity (CCap) are derived from the input fields welfare recipients (WR), children younger 10 years old (C), elderly singles older 65 years old (ES) and people within a house leaving school within the past three years without high school diploma (EDQ). Columns “Statistical Unit”, “Residents” and “Living Area” are obtained from the statistical unit (city sub-level) information and attributed to the building dataset.

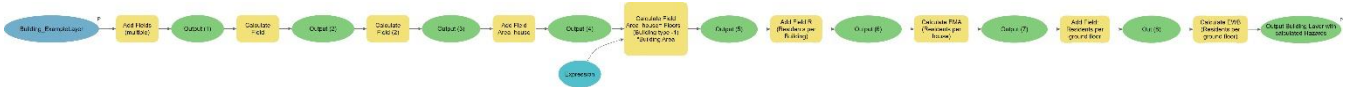

**Figure S4: Complete workflow of the Exposure tool.** Parameters (P) allow the user to set the input and output settings. Yellow boxes depict calculation steps whereas green boxes depict intermediate results. The expression box is used to set the input formula for the calculation of the buildings area, as shown in Eq. 4).

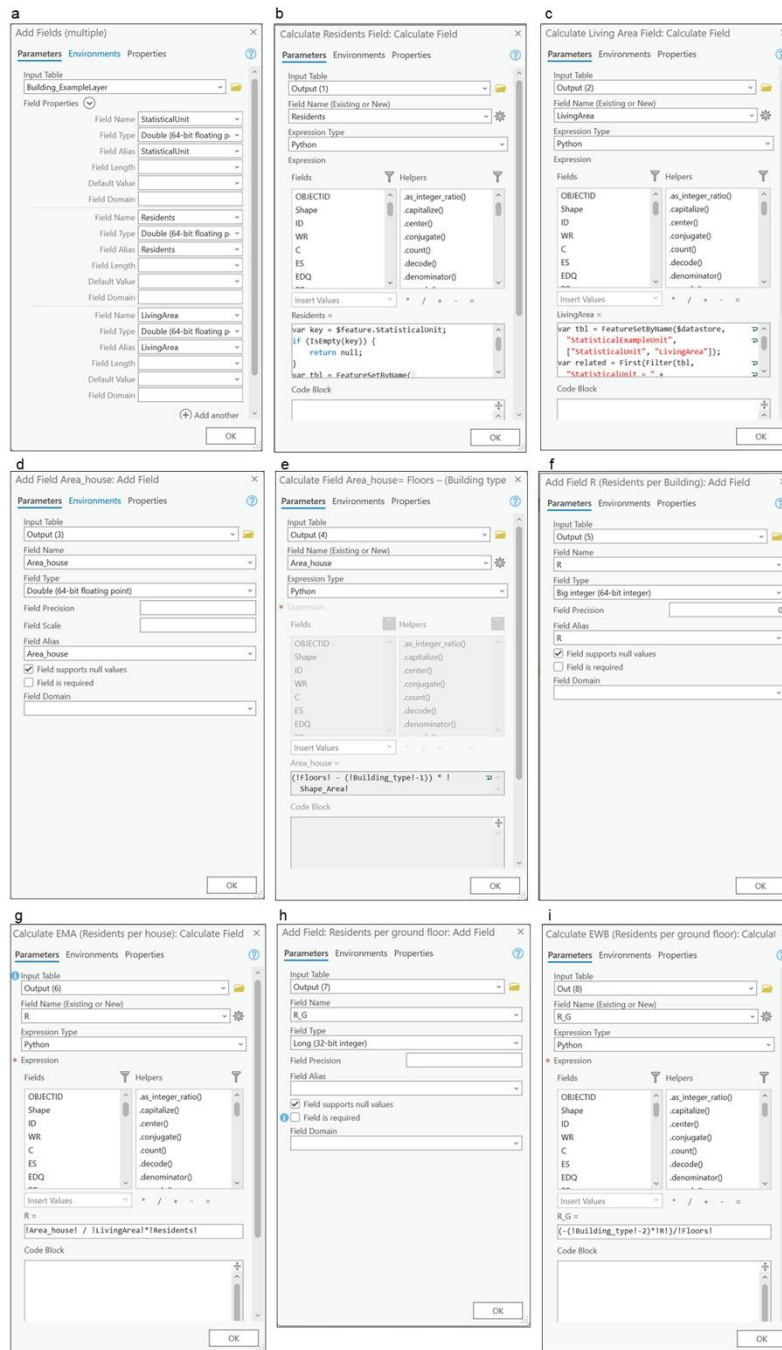

**Figure S5: Exposure tool.** This graphic depicts the underlying tools of the exposure tool including the combination of statistical unit information with building data (a to c), the estimation of the building area and residents per building (d to f) and the corresponding estimation of exposure index relative to well-being (g) and mobility and accessibility (h,i).

|    | OBJECTID * | Shape * | ID | WR | C | ES | EDQ | Floors | Building type | StatisticalUnit | Residents | LivingArea | Area_house | EMA | EWB |
|----|------------|---------|----|----|---|----|-----|--------|---------------|-----------------|-----------|------------|------------|-----|-----|
| 1  | 1          | Polygon | 1  | 1  | 1 | 0  | 0   | 1      | 1             | 1               | 250       | 9000       | 221,78     | 5   | 5   |
| 2  | 2          | Polygon | 2  | 1  | 1 | 0  | 0   | 1      | 1             | 1               | 250       | 9000       | 214,24     | 5   | 5   |
| 3  | 3          | Polygon | 3  | 2  | 2 | 1  | 1   | 2      | 1             | 1               | 250       | 9000       | 359,24     | 10  | 5   |
| 4  | 4          | Polygon | 4  | 0  | 1 | 1  | 0   | 2      | 2             | 1               | 250       | 9000       | 372,77     | 8   | 0   |
| 5  | 5          | Polygon | 5  | 1  | 1 | 1  | 0   | 1      | 1             | 1               | 250       | 9000       | 209,23     | 5   | 5   |
| 6  | 6          | Polygon | 6  | 1  | 1 | 1  | 0   | 1      | 1             | 1               | 250       | 9000       | 250,03     | 6   | 6   |
| 7  | 7          | Polygon | 7  | 4  | 3 | 2  | 1   | 2      | 1             | 1               | 250       | 9000       | 667,58     | 20  | 10  |
| 8  | 8          | Polygon | 8  | 1  | 0 | 0  | 0   | 1      | 1             | 1               | 250       | 9000       | 209,23     | 5   | 5   |
| 9  | 9          | Polygon | 9  | 2  | 0 | 1  | 0   | 1      | 1             | 1               | 250       | 9000       | 300,29     | 7   | 7   |
| 10 | 10         | Polygon | 10 | 0  | 0 | 1  | 0   | 2      | 1             | 1               | 250       | 9000       | 285,75     | 6   | 3   |

**Figure S6: Attribute table of the example data table after implementing the Exposure Toolset.** Welfare recipients (WR), children younger 10 years old(C), elderly singles older 65 years old (ES) and people within a house leaving school within the past three years without a high school diploma (EDQ). Columns “Statistical Unit”, “Residents” and “Living Area” are obtained from the statistical unit (city sub-level) information and attributed to the building dataset. Residents per building (R) correspond to  $E_{MA}$  and Residents per ground floor (R\_G) correspond to  $E_{WB}$  within the presented framework.

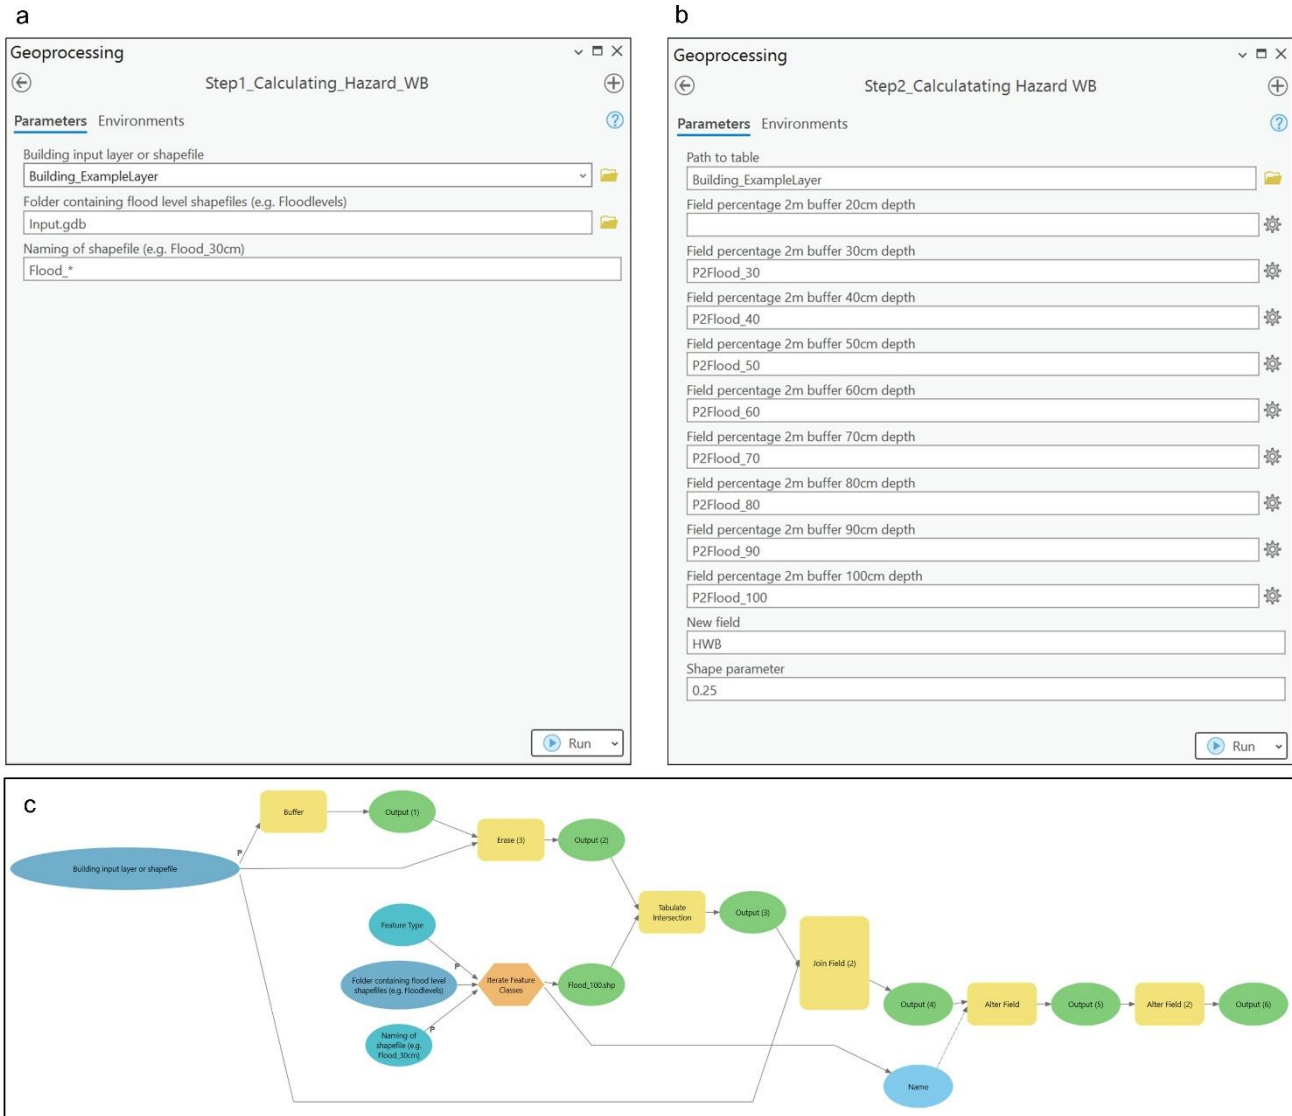

70 **Figure S7: Toolset to calculate the hazard index related to well-being.** (a) shows the first tool, used to calculate the intersected areas between flood layers and affected buildings. (b) shows the second tool used to calculate the resulting hazard value (HWB). (c) depicts the corresponding workflow behind the first tool (Step 1).

| A2Flood_30 | P2Flood_30 | A2Flood_40 | P2Flood_40 | A2Flood_50 | P2Flood_50 | A2Flood_60 | P2Flood_60 | A2Flood_70 | P2Flood_70 | A2Flood_80 | P2Flood_80 | A2Flood_90 | P2Flood_90 | A2Flood_100 | P2Flood_100 | HWB  |
|------------|------------|------------|------------|------------|------------|------------|------------|------------|------------|------------|------------|------------|------------|-------------|-------------|------|
| 37.96      | 91.76      | 37.96      | 91.76      | 37.96      | 91.76      | 37.96      | 91.76      | 37.65      | 91         | 36.02      | 87.06      | 21.91      | 52.95      | 3.27        | 7.91        | 7    |
| 26.93      | 78.61      | 15         | 43.78      | 10.68      | 31.17      | 5.95       | 17.36      | 0.39       | 1.14       | 0          | 0          | 0          | 0          | 0           | 0           | 2.87 |
| 0.63       | 2          | 0          | 0          | 0          | 0          | 0          | 0          | 0          | 0          | 0          | 0          | 0          | 0          | 0           | 0           | 0    |
| 12.22      | 17.15      | 5.74       | 8.06       | 0          | 0          | 0          | 0          | 0          | 0          | 0          | 0          | 0          | 0          | 0           | 0           | 0.07 |
| 0          | 0          | 0          | 0          | 0          | 0          | 0          | 0          | 0          | 0          | 0          | 0          | 0          | 0          | 0           | 0           | 0    |
| 0          | 0          | 0          | 0          | 0          | 0          | 0          | 0          | 0          | 0          | 0          | 0          | 0          | 0          | 0           | 0           | 0    |
| 0          | 0          | 0          | 0          | 0          | 0          | 0          | 0          | 0          | 0          | 0          | 0          | 0          | 0          | 0           | 0           | 0    |
| 0          | 0          | 0          | 0          | 0          | 0          | 0          | 0          | 0          | 0          | 0          | 0          | 0          | 0          | 0           | 0           | 0    |
| 0          | 0          | 0          | 0          | 0          | 0          | 0          | 0          | 0          | 0          | 0          | 0          | 0          | 0          | 0           | 0           | 0    |
| 12.64      | 31.67      | 1.68       | 4.22       | 0          | 0          | 0          | 0          | 0          | 0          | 0          | 0          | 0          | 0          | 0           | 0           | 0.83 |

75

**Figure S8: Attribute table of the example data table after implementing the hazard to well-being toolset.** Each column depicts the calculated intersections as area in m<sup>2</sup> (A) and percentage (P) for the corresponding flood depth named in the column-header using a 2 m buffer around the building. The resulting hazard index related to well-being ( $H_{WB}$ ) ranges for the first ten rows between 0 and 7. “Null” values represent zero overlapping areas.

80

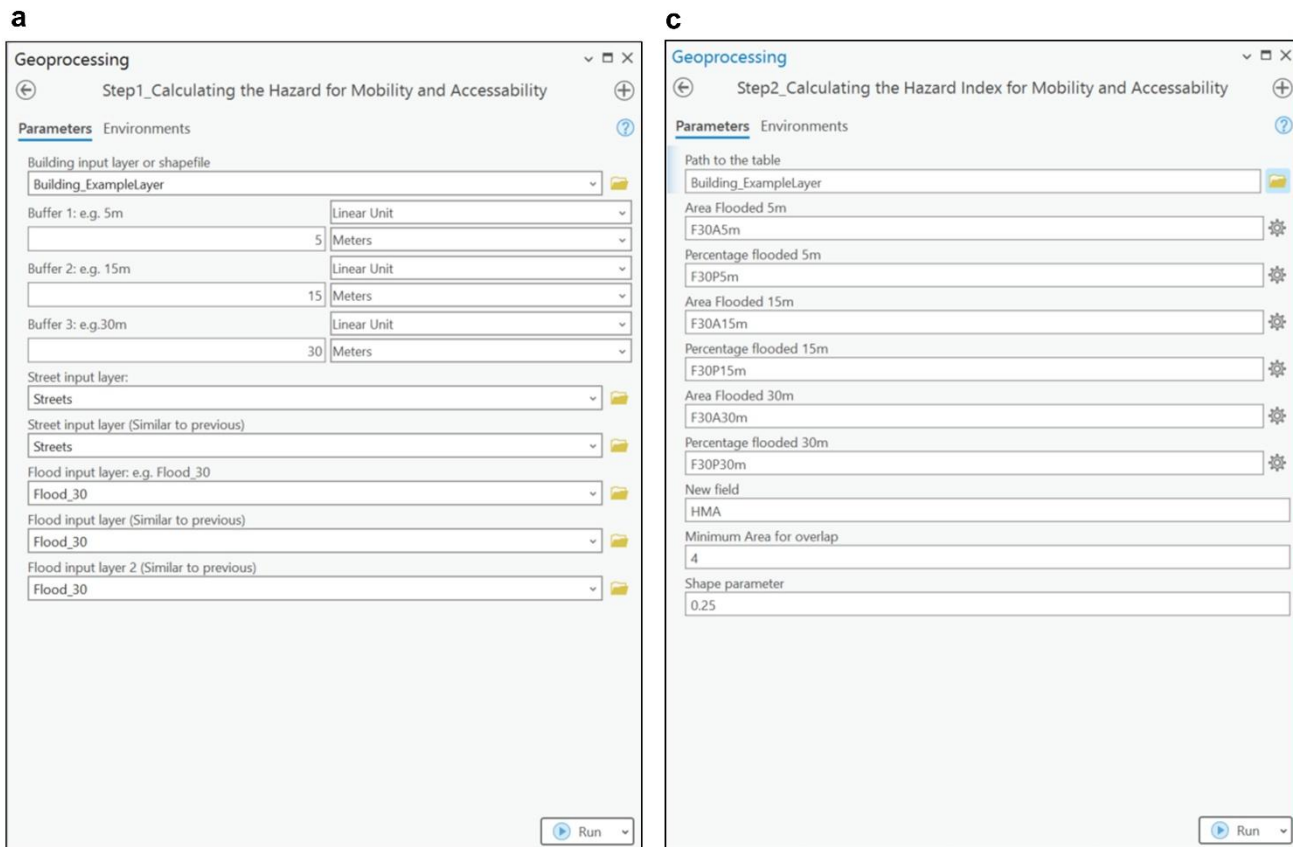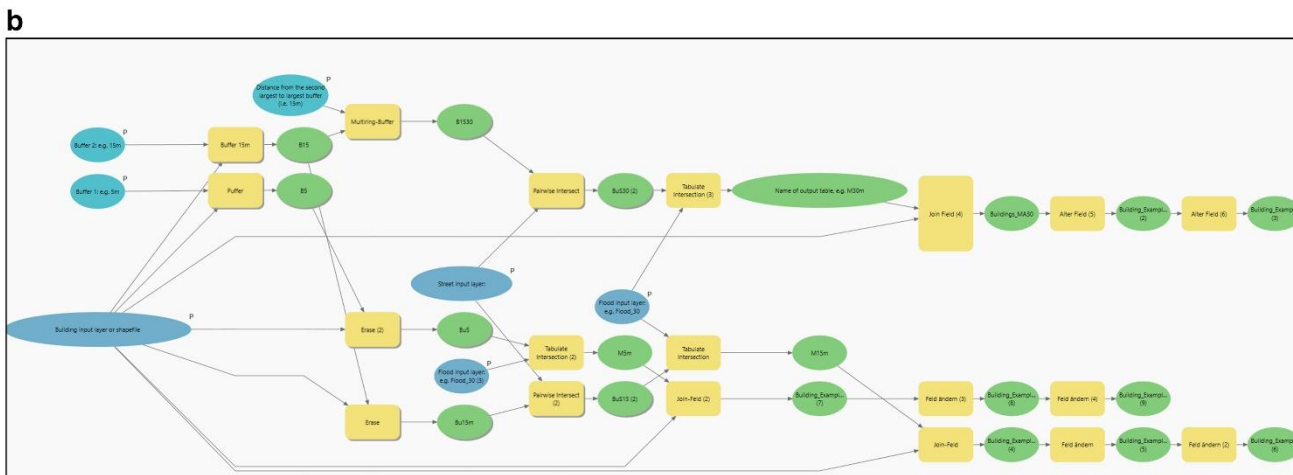

**Figure S9: Toolset to calculate the hazard to mobility and accessibility with a 30 cm flood layer.** (a) shows the first tool, used to calculate the intersected areas between flood layer and affected building (streets, respectively). (b) shows the corresponding workflow behind the tool and (c) shows the second tool used to calculate the resulting hazard value (HMA).

|    | OBJECTID * ▲ | F30A30m | F30P30m | F30A15m | F30P15m | F30A5m | F30P5m | HMA  |
|----|--------------|---------|---------|---------|---------|--------|--------|------|
| 1  | 1            | 7,91    | 7,91    | 7,91    | 7,91    | 7,91   | 7,91   | 1    |
| 2  | 2            | 0       | 0       | 0       | 0       | 0      | 0      | 1    |
| 3  | 3            | 0       | 0       | 0       | 0       | 0      | 0      | 0    |
| 4  | 4            | 0       | 0       | 0       | 0       | 0      | 0      | 0,33 |
| 5  | 5            | 0       | 0       | 0       | 0       | 0      | 0      | 0    |
| 6  | 6            | 0       | 0       | 0       | 0       | 0      | 0      | 1    |
| 7  | 7            | 0       | 0       | 0       | 0       | 0      | 0      | 0,92 |
| 8  | 8            | 0       | 0       | 0       | 0       | 0      | 0      | 0,84 |
| 9  | 9            | 0       | 0       | 0       | 0       | 0      | 0      | 0    |
| 10 | 10           | 0       | 0       | 0       | 0       | 0      | 0      | 0,96 |

**Figure S10: Attribute table of the example data table after implementing the Hazard to Mobility and Accessibility Toolset.**

F305m depicts the calculated intersections as area in m<sup>2</sup> (A) and percentage (P) for the flood depth of 30cm and a 5m buffer around the building, as well as interesting streets with 15m, and 15-30m buffer around the building. The resulting hazard for

90 mobility and accessibility ( $H_{MA}$ ) ranges for the first ten rows between 0 and 1.

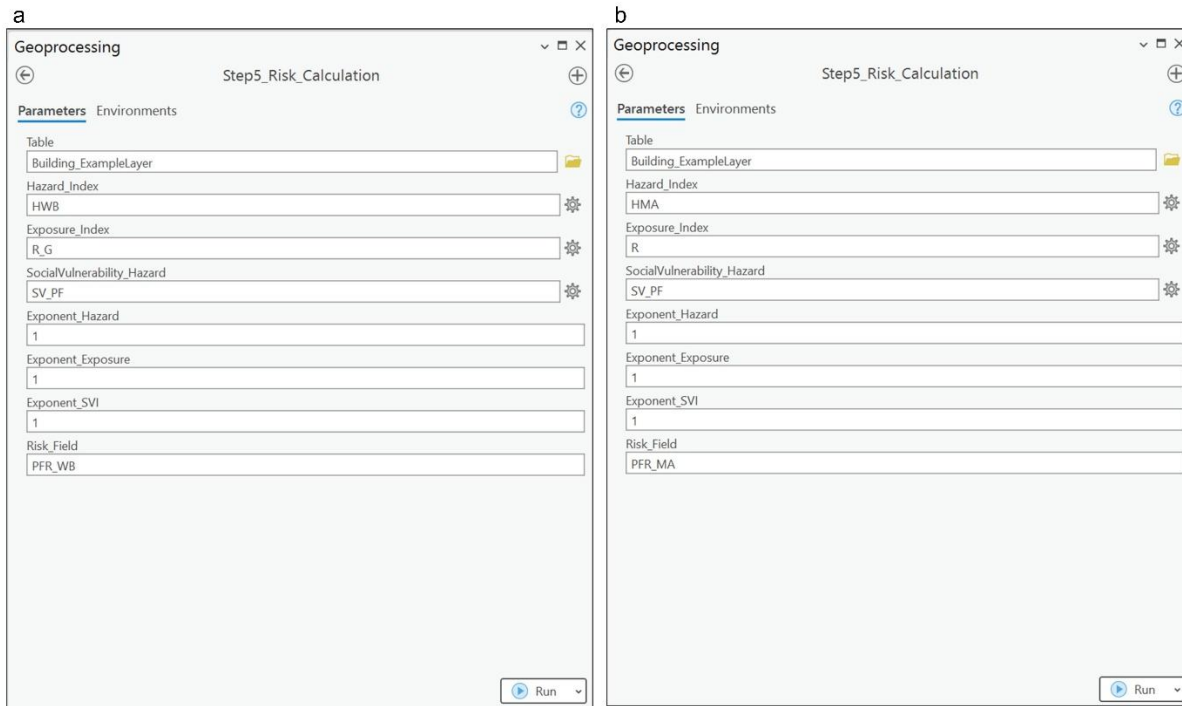

**Figure S11: Risk tool within the Pluvial flood risk framework.** To calculate the pluvial flood risk to well-being (a) and to mobility and accessibility (b).

95

|    | OBJECTID * ^ | Shape * | ID | WR | C | ES | EDQ | Floors | Building type | StatisticalUnit | Residents | LivingArea | Area_house | HWB  | HMA  | PFR_WB | PFR_MA |
|----|--------------|---------|----|----|---|----|-----|--------|---------------|-----------------|-----------|------------|------------|------|------|--------|--------|
| 1  | 1            | Polygon | 1  | 1  | 1 | 0  | 0   | 1      | 1             | 1               | 250       | 9000       | 221,78     | 7    | 1    | 6,16   | 0,88   |
| 2  | 2            | Polygon | 2  | 1  | 1 | 0  | 0   | 1      | 1             | 1               | 250       | 9000       | 214,24     | 2,87 | 1    | 2,53   | 0,88   |
| 3  | 3            | Polygon | 3  | 2  | 2 | 1  | 1   | 2      | 1             | 1               | 250       | 9000       | 359,24     | 0    | 0    | 0      | 0      |
| 4  | 4            | Polygon | 4  | 0  | 1 | 1  | 0   | 2      | 2             | 1               | 250       | 9000       | 372,77     | 0,07 | 0,33 | 0      | 1,58   |
| 5  | 5            | Polygon | 5  | 1  | 1 | 1  | 0   | 1      | 1             | 1               | 250       | 9000       | 209,23     | 0    | 0    | 0      | 0      |
| 6  | 6            | Polygon | 6  | 1  | 1 | 1  | 0   | 1      | 1             | 1               | 250       | 9000       | 250,03     | 0    | 1    | 0      | 1,99   |
| 7  | 7            | Polygon | 7  | 4  | 3 | 2  | 1   | 2      | 1             | 1               | 250       | 9000       | 667,58     | 0    | 0,92 | 0      | 23,47  |
| 8  | 8            | Polygon | 8  | 1  | 0 | 0  | 0   | 1      | 1             | 1               | 250       | 9000       | 209,23     | 0    | 0,84 | 0      | 1,33   |
| 9  | 9            | Polygon | 9  | 2  | 0 | 1  | 0   | 1      | 1             | 1               | 250       | 9000       | 300,29     | 0    | 0    | 0      | 0      |
| 10 | 10           | Polygon | 10 | 0  | 0 | 1  | 0   | 2      | 1             | 1               | 250       | 9000       | 285,75     | 0,83 | 0,96 | 2,43   | 5,61   |

**Figure S12: Attribute table of the example data table after implementing the risk calculation.** The columns  $PFR_{WB}$  and  $PFR_{MA}$  represent the calculated values for the first 10 rows of the example dataset. The complete dataset and table can be viewed in ArcGIS and the attached excel table file provided in the supplement data.

100

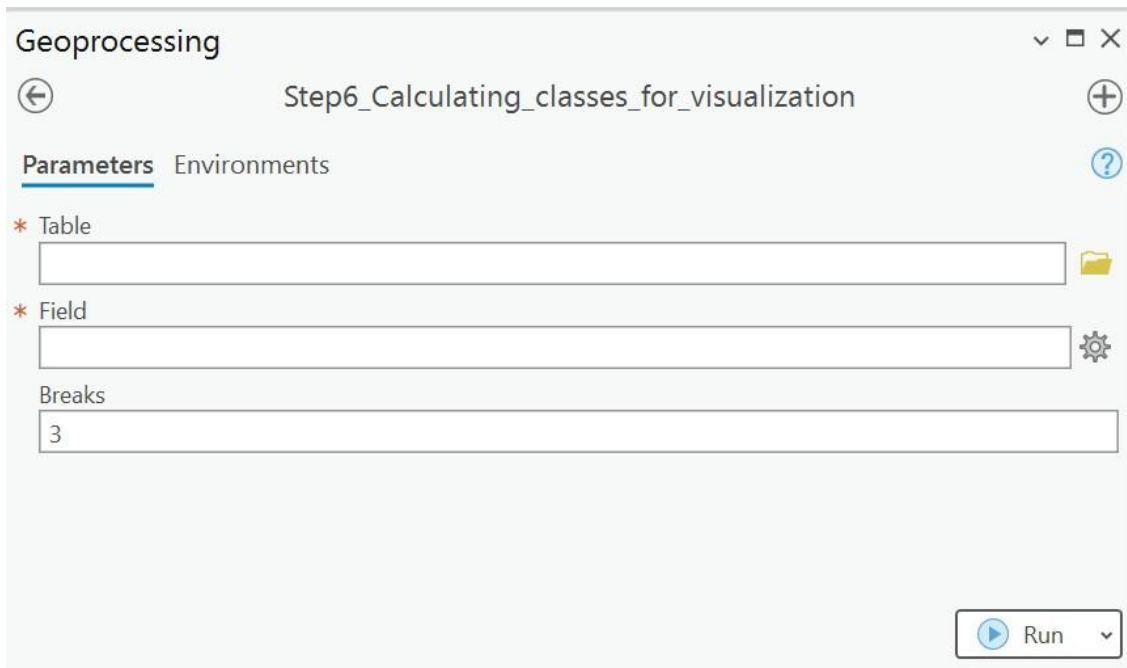

**Figure S13: Visualization tool provided within the pluvial flood risk framework.** *Breaks* refers to the classes used for the maps using an iterative mean-based filtering process.

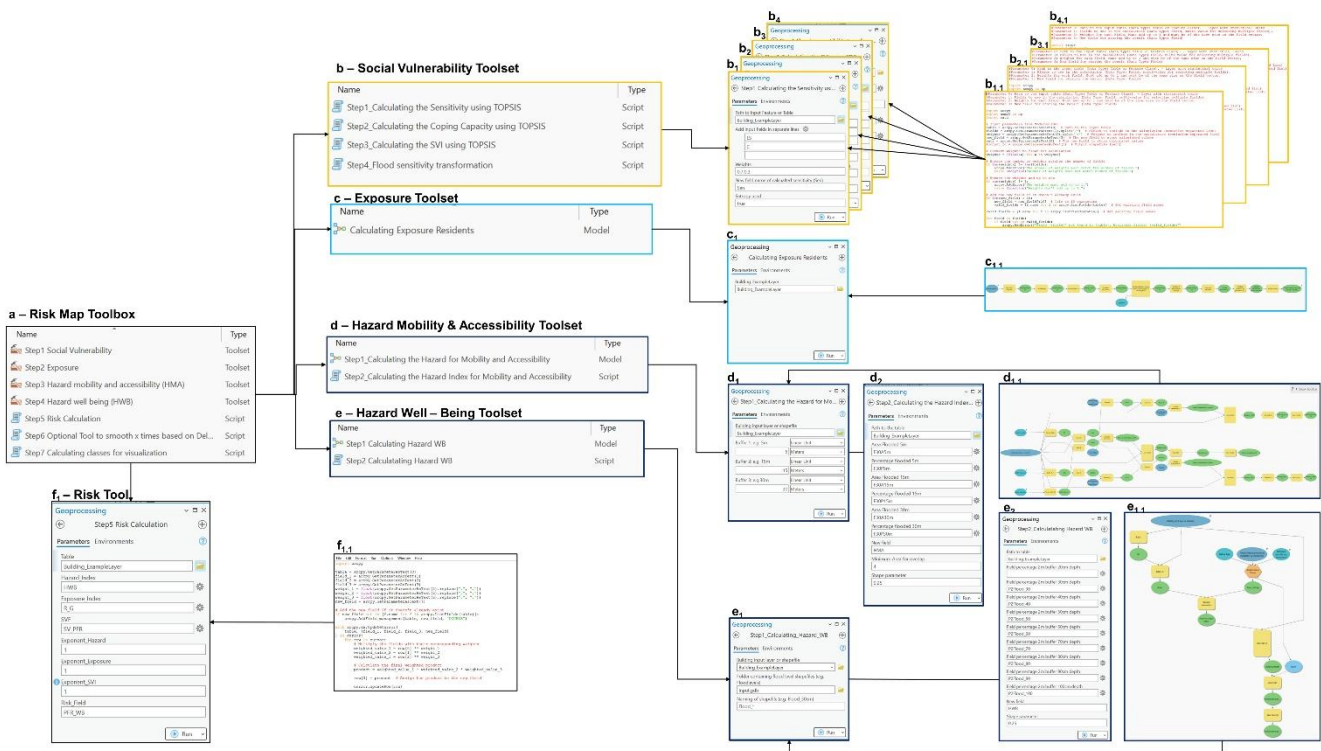

**Figure S14: Outline of the Risk Map Toolbox.** The coloured borders represent the corresponding risk parameters (Social Vulnerability, Exposure, Hazard). (a) shows the first level of the toolbox whereas (b) to (f) corresponds to toolsets within the toolbox. (b1) to (b4) (c1 to e1 respectively) represent the user interface of the individual toolsets. b1.1 to f.1.1 correspond to the underlying python scripts and model builder toolsets, running in the background of each tool.
