# Supplementary material for: A High-Resolution Framework for Urban Pluvial Flood Risk Mapping
Source: Copernicus journal article supplement (doi:10.5194/egusphere-2025-6362), 2026-01-12
Supplement: Supplementary file 2 [file egusphere-2025-6362-supplement.pdf]

# Supplemental material of

## A High-Resolution Framework for Urban Pluvial Flood Risk Mapping

5 Anastasia Vogelbacher<sup>1,2\*</sup>, Malte von Szombathely<sup>3</sup>, Marc Lennartz<sup>4</sup>, Benjamin Poschlod<sup>3</sup> and Jana Sillmann<sup>3</sup>

<sup>1</sup> Institute of Geo-Hydroinformatics , Hamburg University of Technology, Institute of Geo-Hydroinformatics, Hamburg, Germany

10 <sup>2</sup>United Nations University Hub on Engineering to Face Climate Change at the Hamburg University of Technology, United Nations University Institute for Water, Environment and Health (UNU-INWEH), Hamburg, Germany

<sup>3</sup>Research Unit Sustainability and Climate Risk, Center for Earth System Research and Sustainability (CEN), Universität Hamburg, Grindelberg 5, 20144 Hamburg, Germany

<sup>4</sup>Section Hydrology, GFZ Helmholtz Centre for Geosciences, P.O. Box 60 12 03, 14412 Potsdam, Germany

15 *Correspondence to:* Malte von Szombathely (malte.szombathely@uni-hamburg.de), Anastasia Vogelbacher (anastasia.vogelbacher@tuhh.de)

### 20 **Contents of this file**

Figures S1 to S14

### 25 **Introduction**

Supplementary information includes information on input data and tool user interfaces. Additionally, we provide figures of the output attribute tables of the applied ArcGIS tools.

|    | OBJECTID * ▲ | Shape * | ID | WR | C | ES | EDQ | Floors | Building type | StatisticalUnit |
|----|--------------|---------|----|----|---|----|-----|--------|---------------|-----------------|
| 1  | 1            | Polygon | 1  | 1  | 1 | 0  | 0   | 1      | 1             | 1               |
| 2  | 2            | Polygon | 2  | 1  | 1 | 0  | 0   | 1      | 1             | 1               |
| 3  | 3            | Polygon | 3  | 2  | 2 | 1  | 1   | 2      | 1             | 1               |
| 4  | 4            | Polygon | 4  | 0  | 1 | 1  | 0   | 2      | 2             | 1               |
| 5  | 5            | Polygon | 5  | 1  | 1 | 1  | 0   | 1      | 1             | 1               |
| 6  | 6            | Polygon | 6  | 1  | 1 | 1  | 0   | 1      | 1             | 1               |
| 7  | 7            | Polygon | 7  | 4  | 3 | 2  | 1   | 2      | 1             | 1               |
| 8  | 8            | Polygon | 8  | 1  | 0 | 0  | 0   | 1      | 1             | 1               |
| 9  | 9            | Polygon | 9  | 2  | 0 | 1  | 0   | 1      | 1             | 1               |
| 10 | 10           | Polygon | 10 | 0  | 0 | 1  | 0   | 2      | 1             | 1               |

**Figure S1: Excerpt of input data attribute-table.** The screenshot contains the first ten (of 37) rows of the example ArcGIS-layer used for the analysis. WR reflects the welfare recipients, C the Children younger 10 years old, ES the elderly singles above 65 years old, EDQ represents the educational level. A value of one represents one resident leaving school within the past three years without a high school diploma. Floors reflect the number of floors per building and Building type the usage of solely living use (1) or mixed use (2).

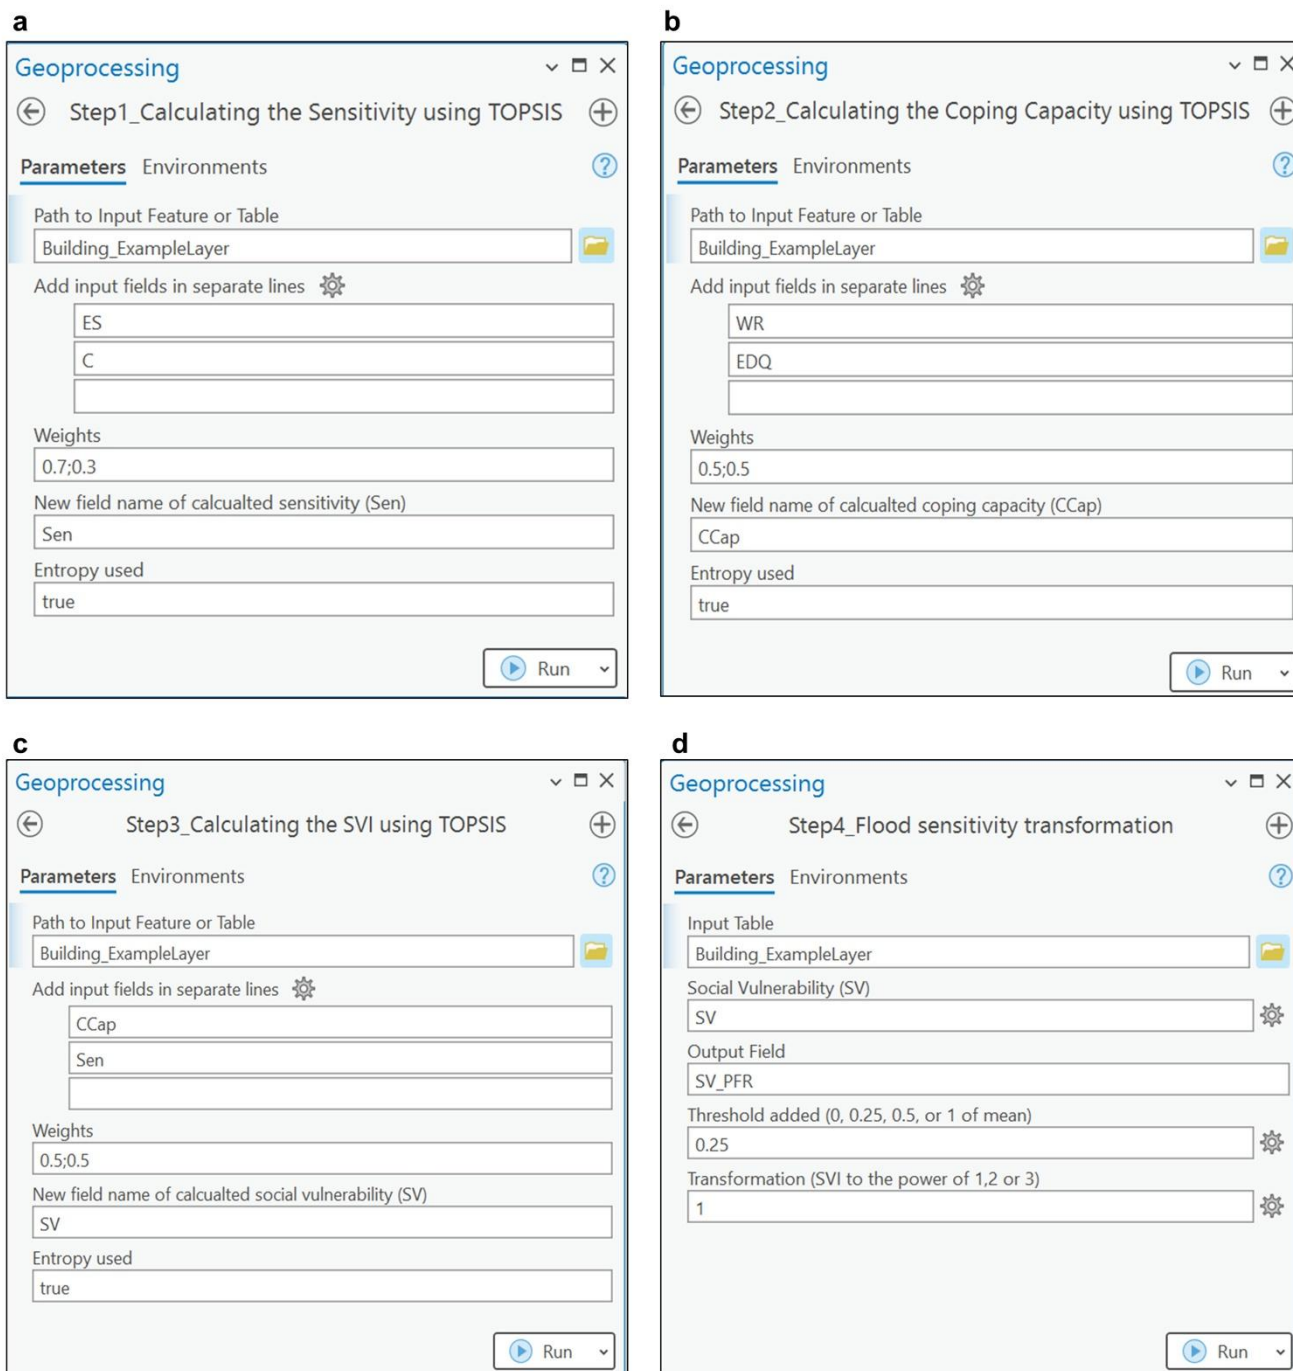

**Figure S2: Social Vulnerability Tools.** (a) shows the tool used for the calculation of sensitivity using the example layer as input. (b) shows the second tool used for the estimation of coping capacity, whereas (c) depict the calculator of the social vulnerability variable (SV) and its transformation to the final SV index to pluvial flood risk ( $SV_{PFR}$ )



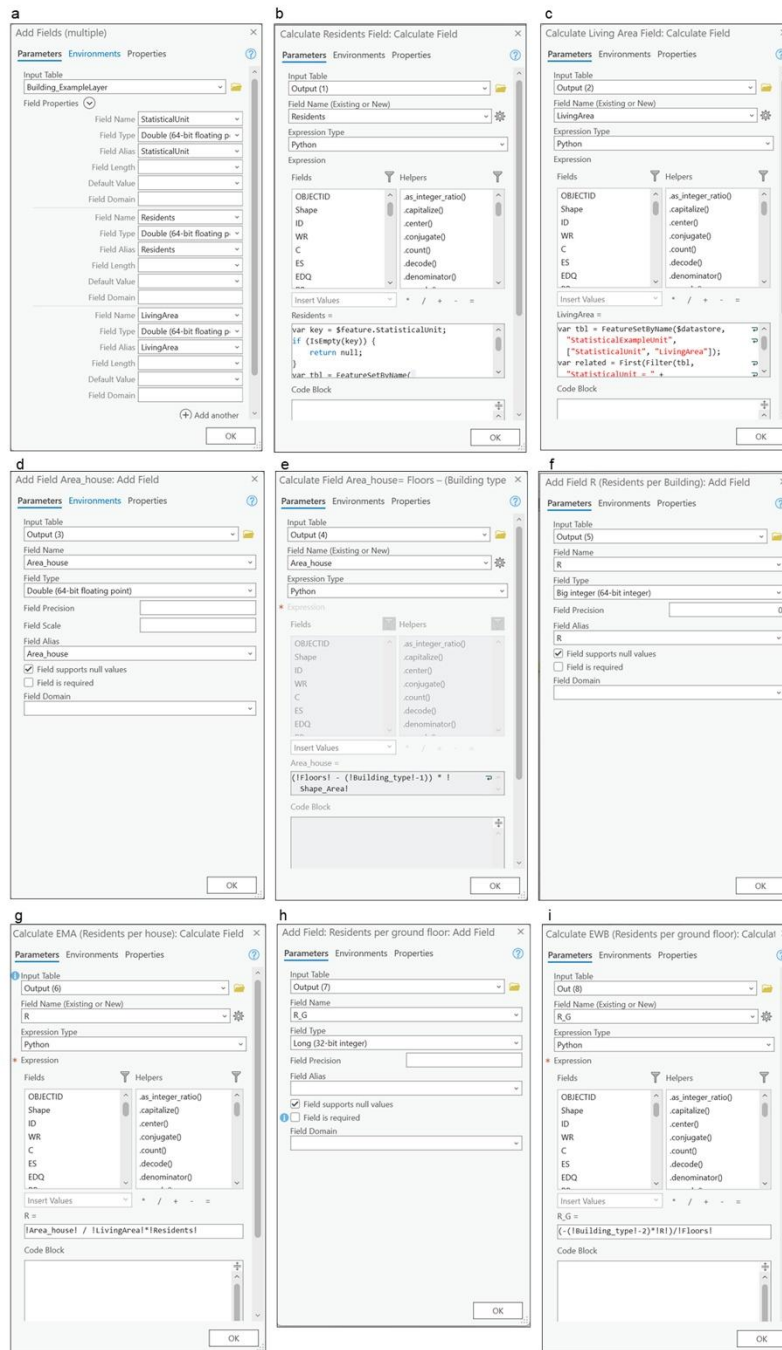

**Figure S5: Exposure tool.** This graphic depicts the underlying tools of the exposure tool including the combination of statistical unit information with building data (a to c), the estimation of the building area and residents per building (d to f) and the corresponding estimation of exposure index relative to well-being (g) and mobility and accessibility (h,i).

|    | OBJECTID * | Shape * | ID | WR | C | ES | EDQ | Floors | Building type | StatisticalUnit | Residents | LivingArea | Area_house | EMA | EWB |
|----|------------|---------|----|----|---|----|-----|--------|---------------|-----------------|-----------|------------|------------|-----|-----|
| 1  | 1          | Polygon | 1  | 1  | 1 | 0  | 0   | 1      | 1             | 1               | 250       | 9000       | 221,78     | 5   | 5   |
| 2  | 2          | Polygon | 2  | 1  | 1 | 0  | 0   | 1      | 1             | 1               | 250       | 9000       | 214,24     | 5   | 5   |
| 3  | 3          | Polygon | 3  | 2  | 2 | 1  | 1   | 2      | 1             | 1               | 250       | 9000       | 359,24     | 10  | 5   |
| 4  | 4          | Polygon | 4  | 0  | 1 | 1  | 0   | 2      | 2             | 1               | 250       | 9000       | 372,77     | 8   | 0   |
| 5  | 5          | Polygon | 5  | 1  | 1 | 1  | 0   | 1      | 1             | 1               | 250       | 9000       | 209,23     | 5   | 5   |
| 6  | 6          | Polygon | 6  | 1  | 1 | 1  | 0   | 1      | 1             | 1               | 250       | 9000       | 250,03     | 6   | 6   |
| 7  | 7          | Polygon | 7  | 4  | 3 | 2  | 1   | 2      | 1             | 1               | 250       | 9000       | 667,58     | 20  | 10  |
| 8  | 8          | Polygon | 8  | 1  | 0 | 0  | 0   | 1      | 1             | 1               | 250       | 9000       | 209,23     | 5   | 5   |
| 9  | 9          | Polygon | 9  | 2  | 0 | 1  | 0   | 1      | 1             | 1               | 250       | 9000       | 300,29     | 7   | 7   |
| 10 | 10         | Polygon | 10 | 0  | 0 | 1  | 0   | 2      | 1             | 1               | 250       | 9000       | 285,75     | 6   | 3   |

**Figure S6: Attribute table of the example data table after implementing the Exposure Toolset.** Welfare recipients (WR), children younger 10 years old(C), elderly singles older 65 years old (ES) and people within a house leaving school within the past three years without a high school diploma (EDQ). Columns “Statistical Unit,” Residents” and “Living Area” are obtained from the statistical unit (city sub-level) information and attributed to the building dataset. Residents per building (R) correspond to  $E_{Ma}$  and Residents per ground floor (R\_G) correspond to  $E_{WB}$  within the presented framework.

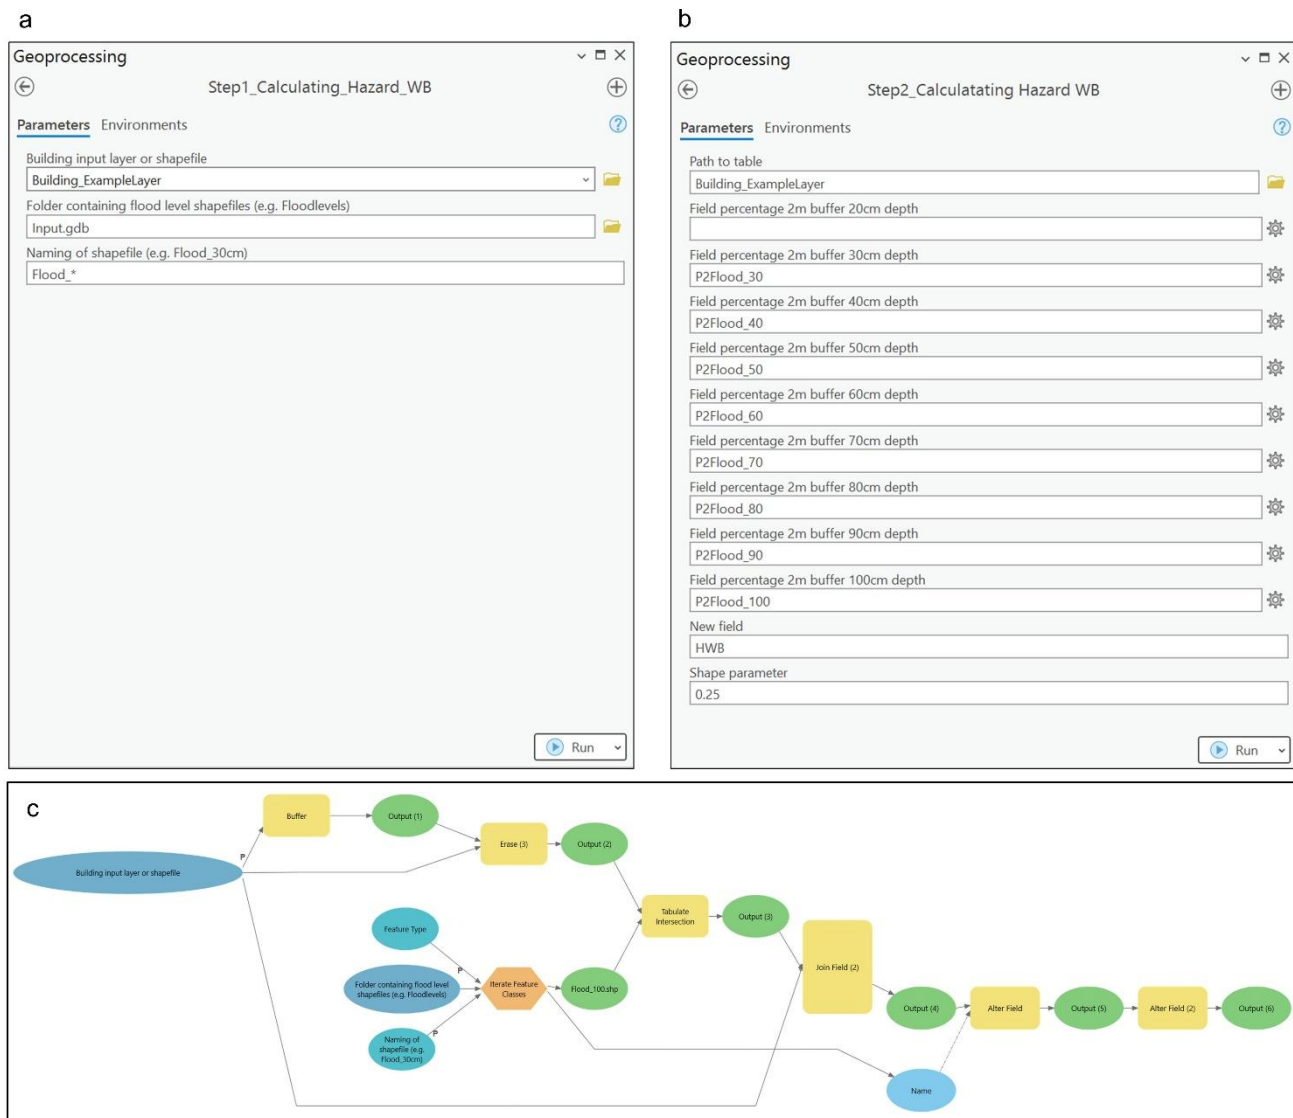

**Figure S7: Toolset to calculate the hazard index related to well-being.** (a) shows the first tool, used to calculate the intersected areas between flood layers and affected buildings. b) shows the second tool used to calculate the resulting hazard value (HWB). (c) depicts the corresponding workflow behind the first tool (Step 1).

75

|    | A2Flood_100 | P2Flood_100 | A2Flood_90 | P2Flood_90 | A2Flood_80 | P2Flood_80 | A2Flood_70 | P2Flood_70 | A2Flood_60 | P2Flood_60 | A2Flood_50 | P2Flood_50 | A2Flood_40 | P2Flood_40 | A2Flood_30 | P2Flood_30 | HWB  |
|----|-------------|-------------|------------|------------|------------|------------|------------|------------|------------|------------|------------|------------|------------|------------|------------|------------|------|
| 1  | 3,27        | 7,91        | 21,91      | 52,95      | 36,02      | 87,06      | 37,65      | 91         | 37,96      | 91,76      | 37,96      | 91,76      | 37,96      | 91,76      | 37,96      | 91,76      | 7    |
| 2  | <Null>      | <Null>      | <Null>     | <Null>     | <Null>     | <Null>     | 0,39       | 1,14       | 5,95       | 17,36      | 10,68      | 31,17      | 15         | 43,78      | 26,93      | 78,61      | 2,87 |
| 3  | <Null>      | <Null>      | <Null>     | <Null>     | <Null>     | <Null>     | <Null>     | <Null>     | <Null>     | <Null>     | <Null>     | <Null>     | <Null>     | <Null>     | 0,63       | 2          | 0    |
| 4  | <Null>      | <Null>      | <Null>     | <Null>     | <Null>     | <Null>     | <Null>     | <Null>     | <Null>     | <Null>     | <Null>     | <Null>     | 5,74       | 8,06       | 12,22      | 17,15      | 0,07 |
| 5  | <Null>      | <Null>      | <Null>     | <Null>     | <Null>     | <Null>     | <Null>     | <Null>     | <Null>     | <Null>     | <Null>     | <Null>     | <Null>     | <Null>     | <Null>     | <Null>     | 0    |
| 6  | <Null>      | <Null>      | <Null>     | <Null>     | <Null>     | <Null>     | <Null>     | <Null>     | <Null>     | <Null>     | <Null>     | <Null>     | <Null>     | <Null>     | <Null>     | <Null>     | 0    |
| 7  | <Null>      | <Null>      | <Null>     | <Null>     | <Null>     | <Null>     | <Null>     | <Null>     | <Null>     | <Null>     | <Null>     | <Null>     | <Null>     | <Null>     | <Null>     | <Null>     | 0    |
| 8  | <Null>      | <Null>      | <Null>     | <Null>     | <Null>     | <Null>     | <Null>     | <Null>     | <Null>     | <Null>     | <Null>     | <Null>     | <Null>     | <Null>     | <Null>     | <Null>     | 0    |
| 9  | <Null>      | <Null>      | <Null>     | <Null>     | <Null>     | <Null>     | <Null>     | <Null>     | <Null>     | <Null>     | <Null>     | <Null>     | <Null>     | <Null>     | <Null>     | <Null>     | 0    |
| 10 | <Null>      | <Null>      | <Null>     | <Null>     | <Null>     | <Null>     | <Null>     | <Null>     | <Null>     | <Null>     | <Null>     | <Null>     | 1,68       | 4,22       | 12,64      | 31,67      | 0,83 |

**Figure S8: Attribute table of the example data table after implementing the hazard to well-being toolset.** Each column depicts the calculated intersections as area in m<sup>2</sup> (A) and percentage (P) for the corresponding flood depth named in the column-header using a 2 m buffer around the building. The resulting hazard index related to well-being ( $H_{WB}$ ) ranges for the first ten rows between 0 and 7. “Null” values represent zero overlapping areas.

80



**a**

### Geoprocessing

Step1\_Calculating the Hazard for Mobility and Accessibility

**Parameters** Environments

Building input layer or shapefile  
Building\_ExampleLayer

Buffer 1: e.g. 5m  
5 Meters

Buffer 2: e.g. 15m  
15 Meters

Buffer 3: e.g.30m  
30 Meters

Street input layer:  
Streets

Street input layer (Similar to previous)  
Streets

Flood input layer: e.g. Flood\_30  
Flood\_30

Flood input layer (Similar to previous)  
Flood\_30

Flood input layer 2 (Similar to previous)  
Flood\_30

Run

**b**

### Geoprocessing

Step2\_Calculating the Hazard Index for Mobility and Accessibility

**Parameters** Environments

Path to the table  
Building\_ExampleLayer

Area Flooded 5m  
F30A5m

Percentage flooded 5m  
F30P5m

Area Flooded 15m  
F30A15m

Percentage flooded 15m  
F30P15m

Area Flooded 30m  
F30A30m

Percentage flooded 30m  
F30P30m

New field  
HMA

Minimum Area for overlap  
4

Shape parameter  
0.25

Run

**c**

The flowchart details the following steps:

- Input Layers:** Building input layer or shapefile, Buffer 1 (e.g., 5m), Buffer 2 (e.g., 15m), Buffer 3 (e.g., 30m), Street input layer, and Flood input layer.
- Processing Steps:**
  - Buffer 1, 2, and 3 are processed through Buffer creation (B1, B2, B3) and then Union (U1, U2, U3) operations.
  - Street input layer is processed through Intersection (I1, I2, I3) and Union (U4, U5, U6) operations.
  - Flood input layer is processed through Union (U7, U8, U9) and Intersection (I4, I5, I6) operations.
  - The results of these operations are combined in a series of Join Field (J1, J2, J3, J4, J5, J6, J7, J8, J9, J10, J11, J12, J13, J14, J15, J16, J17, J18, J19, J20, J21, J22, J23, J24, J25, J26, J27, J28, J29, J30, J31, J32, J33, J34, J35, J36, J37, J38, J39, J40, J41, J42, J43, J44, J45, J46, J47, J48, J49, J50, J51, J52, J53, J54, J55, J56, J57, J58, J59, J60, J61, J62, J63, J64, J65, J66, J67, J68, J69, J70, J71, J72, J73, J74, J75, J76, J77, J78, J79, J80, J81, J82, J83, J84, J85, J86, J87, J88, J89, J90, J91, J92, J93, J94, J95, J96, J97, J98, J99, J100) operations.
  - The final output is a map showing the Hazard Index for Mobility and Accessibility (HMA) across the study area.

|    | OBJECTID * ▲ | F30A5m | F30P5m | F30A15m | F30P15m | F30A30m | F30P30m | HMA  |
|----|--------------|--------|--------|---------|---------|---------|---------|------|
| 1  | 1            | 113    | 94,86  | 43,69   | 100     | 0       | 0       | 1    |
| 2  | 2            | 88,39  | 86,81  | 0       | 0       | 42,77   | 100     | 1    |
| 3  | 3            | 0,68   | 0,72   | 0       | 0       | 15,15   | 4,25    | 0    |
| 4  | 4            | 43,85  | 22,42  | 0       | 0       | 0       | 0       | 0,33 |
| 5  | 5            | 0      | 0      | 0       | 0       | 3,4     | 6,74    | 0    |
| 6  | 6            | 0      | 0      | 0       | 0       | 43,68   | 56,95   | 1    |
| 7  | 7            | 0      | 0      | 0       | 0       | 73,35   | 45,28   | 0,99 |
| 8  | 8            | 0      | 0      | 0       | 0       | 23,47   | 48,1    | 1    |
| 9  | 9            | 0      | 0      | 0       | 0       | 0       | 0       | 0    |
| 10 | 10           | 25,37  | 22,79  | 0       | 0       | 0       | 0       | 0,36 |

**Figure S10: Attribute table of the example data table after implementing the Hazard to Mobility and Accessibility Toolset.** F305m depicts the calculated intersections as area in m<sup>2</sup> (A) and percentage (P) for the flood depth of 30cm and a 5m buffer around the building, as well as interesting streets with 15m, and 15-30m buffer around the building. The resulting hazard for mobility and accessibility ( $H_{MA}$ ) ranges for the first ten rows between 0 and 1.

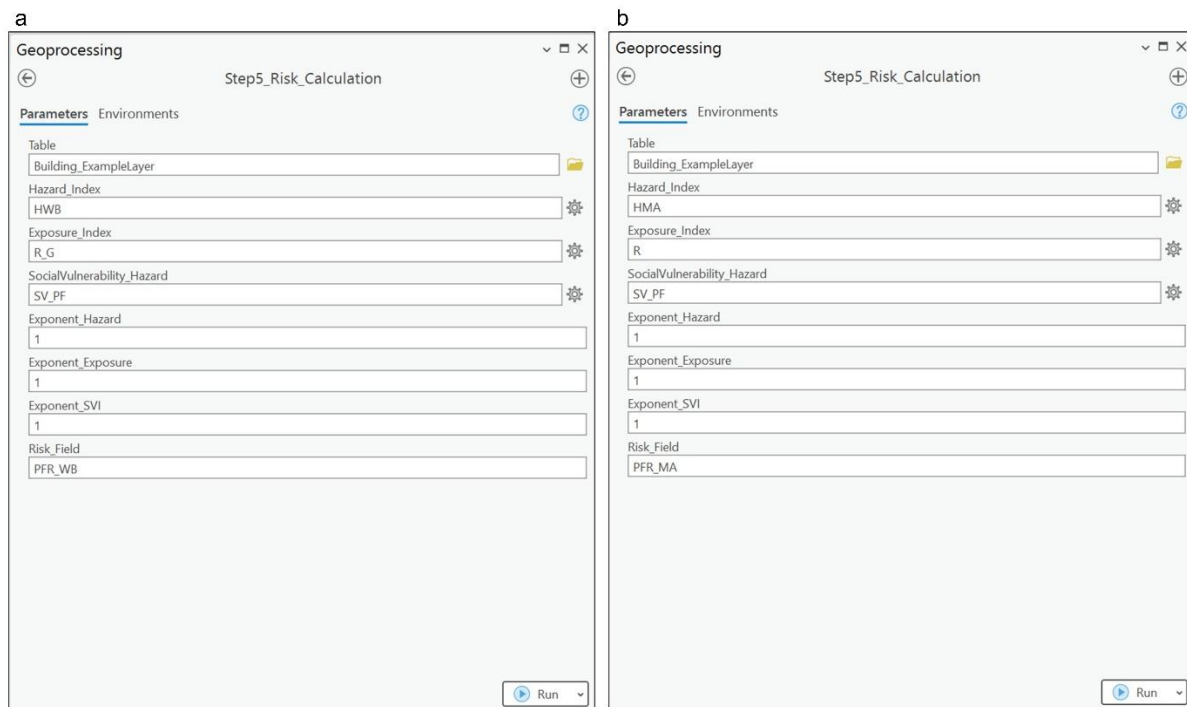

95 **Figure S11: Risk tool within the Pluvial flood risk framework.** To calculate the pluvial flood risk to well-being (a) and to mobility and accessibility (b).

|    | OBJECTID * ▲ | ID | WR | C | ES | EDQ | Floors | Building type | StatisticalUnit | Residents | LivingArea | Area_house | HMA  | HWB  | PFR_WB | PFR_MA |
|----|--------------|----|----|---|----|-----|--------|---------------|-----------------|-----------|------------|------------|------|------|--------|--------|
| 1  | 1            | 1  | 1  | 1 | 0  | 0   | 1      | 1             | 1               | 250       | 9000       | 221,78     | 1    | 7    | 6,16   | 0,88   |
| 2  | 2            | 2  | 1  | 1 | 0  | 0   | 1      | 1             | 1               | 250       | 9000       | 214,24     | 1    | 2,87 | 2,53   | 0,88   |
| 3  | 3            | 3  | 2  | 2 | 1  | 1   | 2      | 1             | 1               | 250       | 9000       | 359,24     | 0    | 0    | 0      | 0      |
| 4  | 4            | 4  | 0  | 1 | 1  | 0   | 2      | 2             | 1               | 250       | 9000       | 372,77     | 0,33 | 0,07 | 0      | 1,58   |
| 5  | 5            | 5  | 1  | 1 | 1  | 0   | 1      | 1             | 1               | 250       | 9000       | 209,23     | 0    | 0    | 0      | 0      |
| 6  | 6            | 6  | 1  | 1 | 1  | 0   | 1      | 1             | 1               | 250       | 9000       | 250,03     | 1    | 0    | 0      | 2      |
| 7  | 7            | 7  | 4  | 3 | 2  | 1   | 2      | 1             | 1               | 250       | 9000       | 667,58     | 0,99 | 0    | 0      | 25,2   |
| 8  | 8            | 8  | 1  | 0 | 0  | 0   | 1      | 1             | 1               | 250       | 9000       | 209,23     | 1    | 0    | 0      | 1,58   |
| 9  | 9            | 9  | 2  | 0 | 1  | 0   | 1      | 1             | 1               | 250       | 9000       | 300,29     | 0    | 0    | 0      | 0      |
| 10 | 10           | 10 | 0  | 0 | 1  | 0   | 2      | 1             | 1               | 250       | 9000       | 285,75     | 0,36 | 0,83 | 2,43   | 2,09   |

100 **Figure S12: Attribute table of the example data table after implementing the risk calculation.** The columns  $PFR_{WB}$  and  $PFR_{MA}$  represent the calculated values for the first 10 rows of the example dataset. The complete dataset and table can be viewed in ArcGIS and the attached excel table file provided in the supplement data.



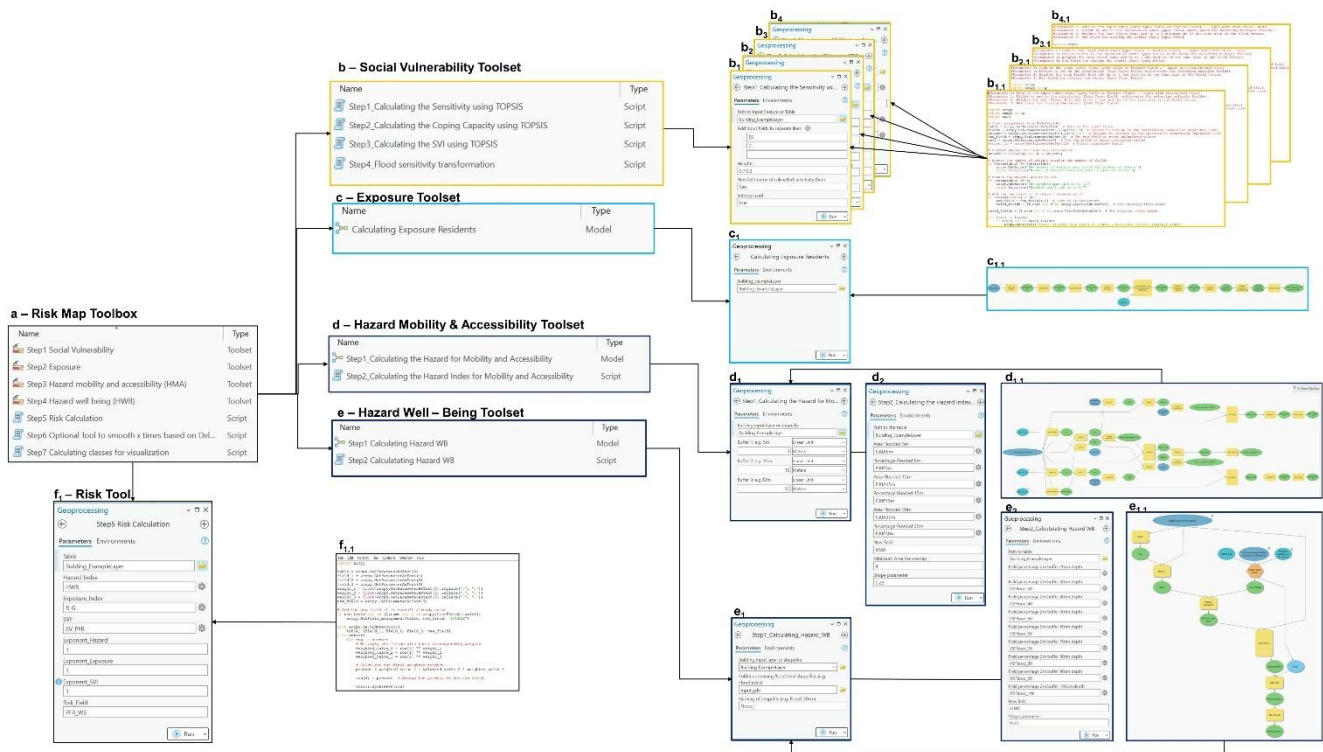

**Figure S14: Outline of the Risk Map Toolbox.** The coloured borders represent the corresponding risk parameters (Social Vulnerability, Exposure, Hazard). (a) shows the first level of the toolbox whereas (b) to (f) corresponds to toolsets within the toolbox. (b1) to (b4) (c1 to e1 respectively) represent the user interface of the individual toolsets. b1.1 to f1.1 correspond to the underlying python scripts and model builder toolsets, running in the background of each tool.
